# Supplementary material for: Continuous Production of Highly Tuned Silk/Calcium-Based Composites: Exploring New Pathways for Skin Regeneration
Source: MDPI journal article supplement (doi:10.3390/molecules27072249), 2022-03-30
Supplement: s1 [file s1]

## Supplementary Material

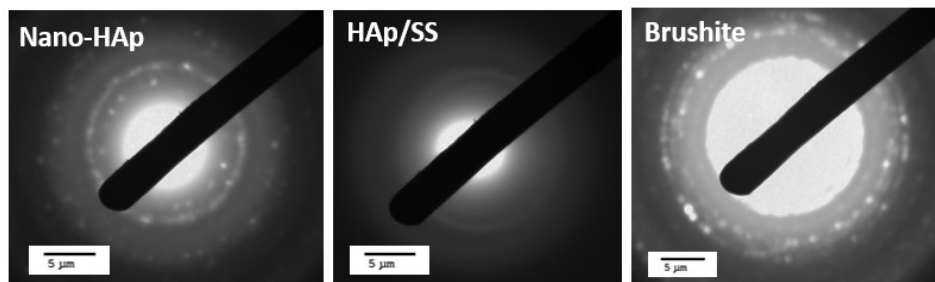

**Figure S1.** SAED (Selected area diffraction) (TEM JEOL, 2200 FS / EDS Oxford, INCA Energy Table 250. analysis on nano-HAp, HAp/SS and Brushite particles. Note: the size of the SAED rings is proportional to the sample's crystallinity.
